# Supplementary material for: New Reference Values for Cardiopulmonary Exercise Testing in Children
Source: PubMed Central journal article supplement — Med Sci Sports Exerc. 2018 Jan 17;50(6):1125–33. doi: 10.1249/MSS.0000000000001559 (PMC6023574; doi:10.1249/mss.0000000000001559), 2018-01-17
Supplement: mss-50-1125-s004.pdf [file mss-50-1125-s004.pdf]

1 **SUPPLEMENTAL DIGITAL CONTENT 3 (Supplemental results)**

2 This supplement presents results for assessment of residual association and conformation to the  
3 normal distribution for all CRF parameters. With our models, we were able to diminish the  
4 residual association for the peak  $O_2$  pulse, the peak workload, OUES and  $V_e/VCO_2$  slope with  
5 BMI-for-age, puberty stage, age, height, body mass and age-adjusted waist circumference  
6 (Figures S1-S4). Table S1 illustrates the slopes and the p-values of the t-statistic for linear  
7 association between the CRF Z scores and body size variables. Overall, we found very little  
8 residual associations of CRF parameters Z scores with height, body mass, pubertal stage, age,  
9 and BMI-for-age. Exception to this is the slight negative association with some CRF Z score  
10 with waist circumference. Such association was however not seen with BMI-for-age. Two CRF  
11 parameters (workload at VAT and OUES) had statistically significant residual association with  
12 age. The association was however weak and close to zero (Figure S5). Table S2 shows the p-  
13 value for departure from a normal distribution with a mean of zero and a standard deviation of  
14 one and percentage of participants with Z scores  $> 2.0$  or  $< -2.0$ . All the CRF parameters Z  
15 scores were normally distributed, except  $V_e/VCO_2$  at VAT. Although statistical significance was  
16 reached, the distribution was visually close to a normal distribution (Figure S6).

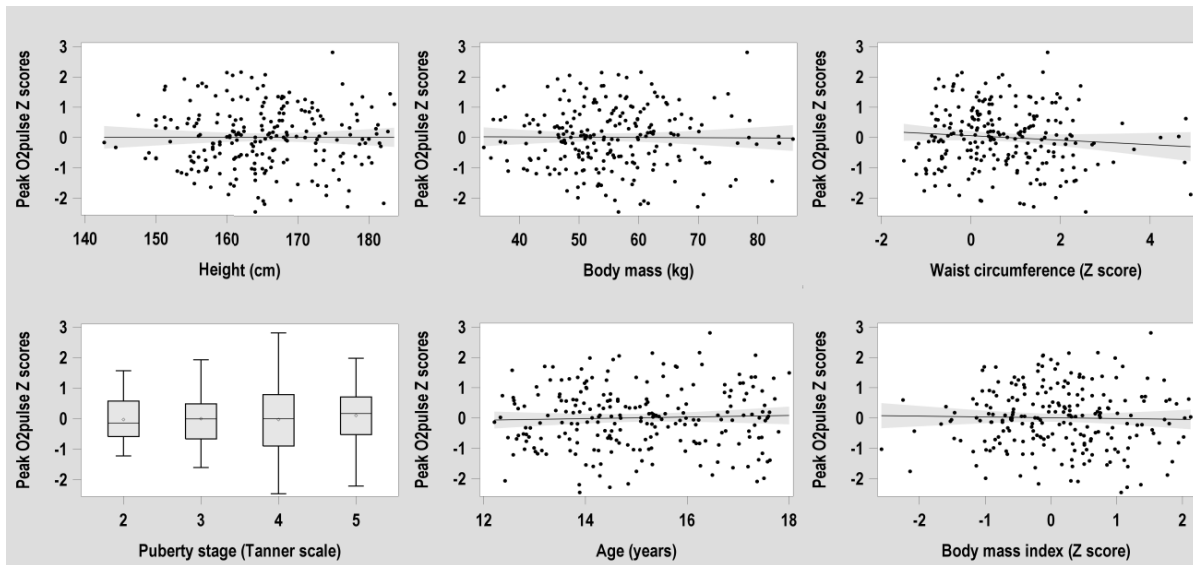

17  
 18 *Figure S1. Absence of residual associations with height, body mass, puberty stage, age, waist circumference*  
 19 *and body mass index with Peak O<sub>2</sub>pulse.*

20

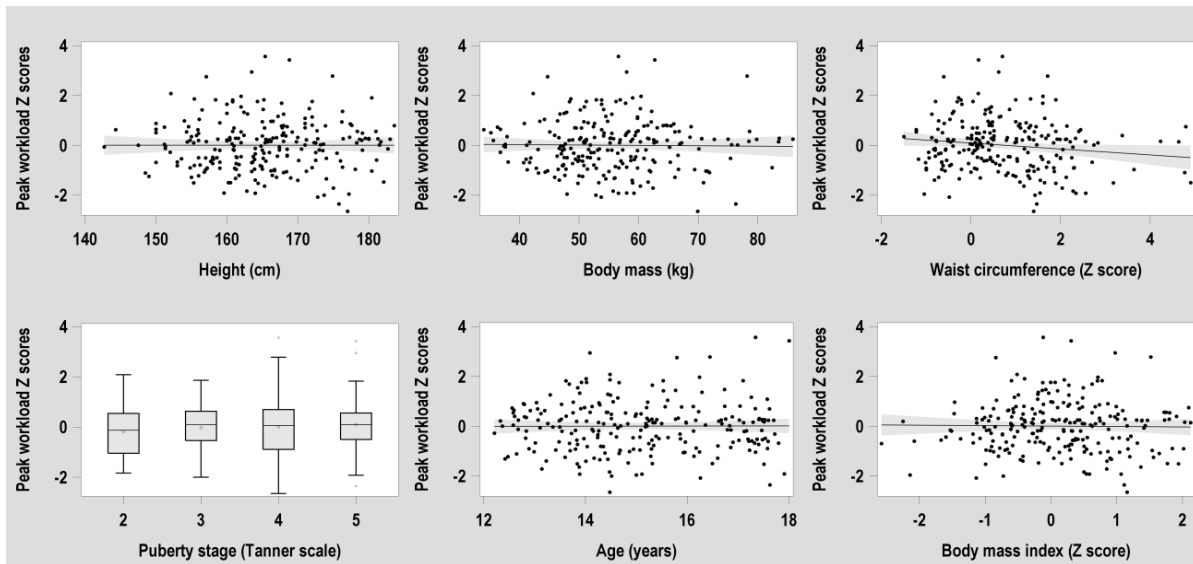

21  
 22 *Figure S2. Absence of residual associations with height, body mass, puberty stage, age, waist circumference*  
 23 *and body mass index with Peak workload.*

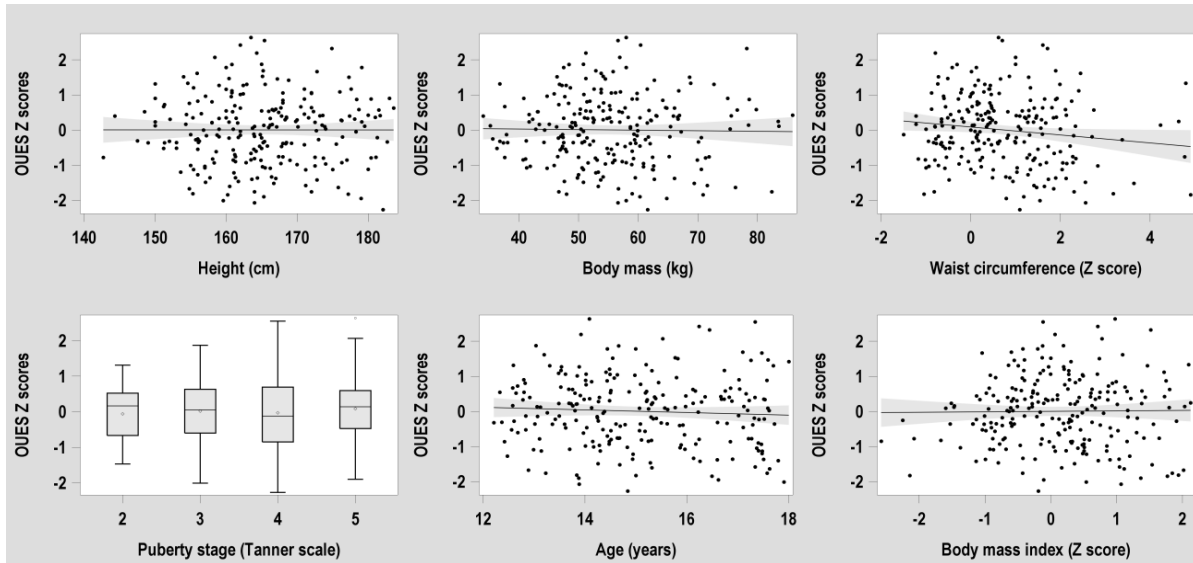

24  
 25 *Figure S3. Absence of residual associations with height, body mass, puberty stage, age, waist circumference*  
 26 *and body mass index with OUES.*

27

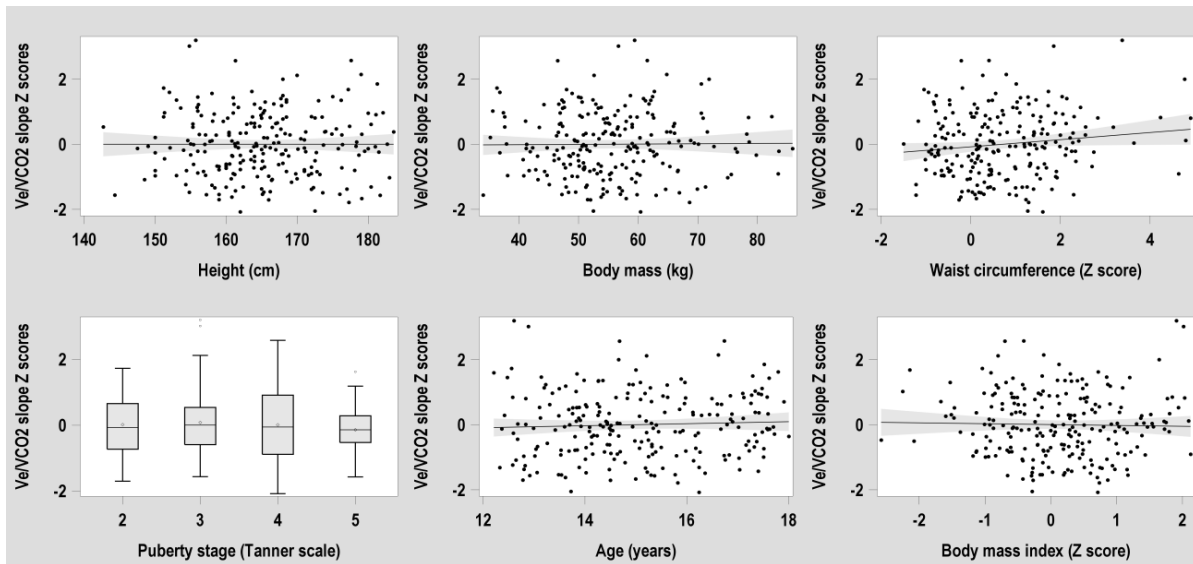

28  
 29 *Figure S4. Absence of residual associations with height, body mass, puberty stage, age, waist circumference*  
 30 *and body mass index with  $V_e/VCO_2$  slope.*

31

32

**Table S1. Residual association for cardiorespiratory fitness parameters**

| CRF Parameters                             | Residual associations |                |           |                |              |                |        |                |                     |                |
|--------------------------------------------|-----------------------|----------------|-----------|----------------|--------------|----------------|--------|----------------|---------------------|----------------|
|                                            | Height                |                | Body mass |                | BMI-for -age |                | Age    |                | Waist circumference |                |
|                                            | Slope                 | <i>P</i> value | Slope     | <i>P</i> value | Slope        | <i>P</i> value | Slope  | <i>P</i> value | Slope               | <i>P</i> value |
| <b>Maximal parameters</b>                  |                       |                |           |                |              |                |        |                |                     |                |
| Peak VO <sub>2</sub>                       | <.001                 | 1.00           | <.001     | 0.89           | 0.087        | 0.22           | -0.083 | 0.10           | -0.061              | 0.28           |
| Peak O <sub>2</sub> pulse                  | <.001                 | 0.99           | -0.001    | 0.86           | 0.075        | 0.30           | -0.072 | 0.09           | -0.074              | 0.19           |
| Peak workload                              | <.001                 | 0.99           | -0.004    | 0.56           | -0.019       | 0.80           | -0.016 | 0.71           | -0.119              | 0.04           |
| Peak V <sub>e</sub>                        | <.001                 | 0.99           | <.001     | 0.92           | 0.039        | 0.59           | -0.009 | 0.82           | 0.018               | 0.75           |
| Peak HR                                    | <.001                 | 1.00           | <.001     | 0.91           | -0.007       | 0.93           | 0.001  | 0.98           | 0.040               | 0.46           |
| RER                                        | <.001                 | 0.99           | -0.002    | 0.72           | -0.021       | 0.77           | -0.005 | 0.92           | -0.049              | 0.37           |
| <b>Submaximal parameters</b>               |                       |                |           |                |              |                |        |                |                     |                |
| OUES                                       | <.001                 | 0.99           | -0.003    | 0.69           | 0.086        | 0.24           | -0.113 | 0.02           | -0.113              | 0.04           |
| OUES below VAT                             | <.001                 | 0.95           | -0.002    | 0.72           | 0.049        | 0.50           | -0.065 | 0.13           | -0.125              | 0.07           |
| V <sub>e</sub> /VCO <sub>2</sub> slope     | <.001                 | 1.00           | 0.004     | 0.53           | 0.020        | 0.79           | 0.040  | 0.36           | 0.110               | 0.05           |
| V <sub>e</sub> /VCO <sub>2</sub> below VAT | <.001                 | 0.98           | 0.004     | 0.54           | 0.038        | 0.61           | -0.002 | 0.97           | 0.144               | 0.01           |
| V <sub>e</sub> /VCO <sub>2</sub> at VAT    | <.001                 | 1.00           | 0.004     | 0.53           | 0.027        | 0.73           | 0.012  | 0.80           | 0.108               | 0.07           |
| VO <sub>2</sub> at VAT                     | <.001                 | 0.99           | -0.001    | 0.82           | 0.024        | 0.74           | -0.010 | 0.82           | -0.049              | 0.38           |
| VO <sub>2</sub> /Work slope                | <.001                 | 1.00           | 0.003     | 0.71           | 0.079        | 0.30           | -0.042 | 0.34           | -0.006              | 0.92           |
| Workload at VAT                            | <.001                 | 1.00           | -0.001    | 0.84           | 0.081        | 0.28           | -0.101 | 0.02           | -0.078              | 0.17           |
| O <sub>2</sub> p/Work slope                | <.001                 | 0.98           | <.001     | 0.91           | 0.016        | 0.83           | -0.002 | 0.96           | -0.077              | 0.30           |
| O <sub>2</sub> pulse increase (%)          | <.001                 | 0.98           | -0.000    | 0.96           | -0.003       | 0.97           | 0.002  | 0.97           | -0.070              | 0.22           |
| HRR1                                       | <.001                 | 0.99           | <.001     | 0.99           | 0.004        | 0.96           | -0.004 | 0.93           | 0.033               | 0.58           |
| HRR2                                       | <.001                 | 0.99           | 0.002     | 0.78           | 0.031        | 0.70           | 0.002  | 0.96           | 0.072               | 0.22           |

34 HR: Heart rate; HRR: Heart rate recovery; O<sub>2</sub>p: O<sub>2</sub>pulse; OUES: Oxygen uptake efficiency slope; RER: Respiratory  
 35 exchange ratio; VAT: Ventilatory anaerobic threshold

36

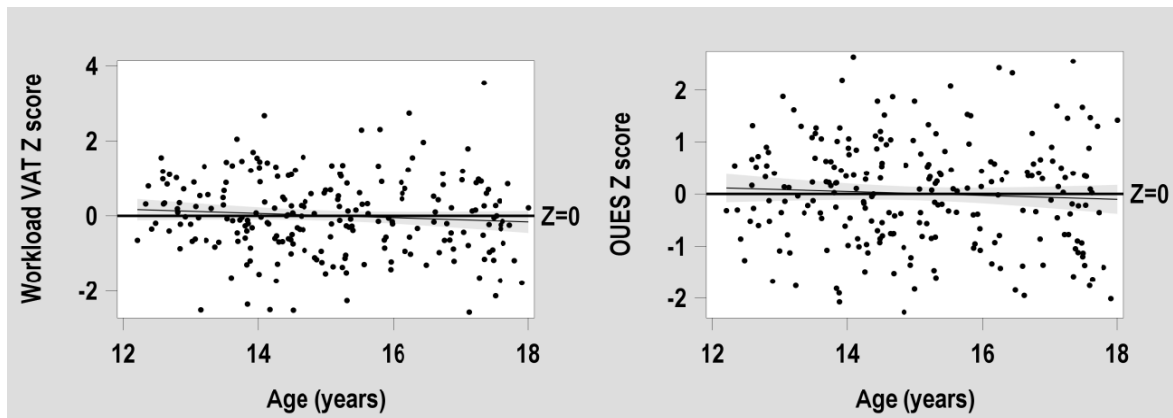

37

38 Figure S5. Residual associations with age with Workload at VAT and OUES.

39

40

41

**Table S2. Assessment for departure from a standard normal distribution**

| CRF Parameters                             | Normal distribution                    |                           |
|--------------------------------------------|----------------------------------------|---------------------------|
|                                            | <i>p</i> value for normal distribution | % of Z values < -2 or > 2 |
| Maximal parameters                         |                                        |                           |
| Peak VO <sub>2</sub>                       | 0.59                                   | 3.51                      |
| Peak O <sub>2</sub> pulse                  | 0.83                                   | 4.04                      |
| Peak workload                              | 0.06                                   | 3.94                      |
| Peak V <sub>e</sub>                        | 0.13                                   | 5.26                      |
| Peak HR                                    | 0.20                                   | 3.14                      |
| RER                                        | 0.38                                   | 5.70                      |
| Submaximal parameters                      |                                        |                           |
| OUES                                       | 0.49                                   | 4.82                      |
| OUES below VAT                             | 0.38                                   | 3.56                      |
| V <sub>e</sub> /VCO <sub>2</sub> slope     | 0.07                                   | 3.56                      |
| V <sub>e</sub> /VCO <sub>2</sub> below VAT | 0.66                                   | 4.89                      |
| V <sub>e</sub> /VCO <sub>2</sub> at VAT    | <.001                                  | 7.89                      |
| VO <sub>2</sub> at VAT                     | 0.07                                   | 4.44                      |
| VO <sub>2</sub> /Work slope                | 0.13                                   | 6.58                      |
| Workload at VAT                            | 0.42                                   | 4.89                      |
| O <sub>2</sub> p/Work slope                | 0.08                                   | 5.26                      |
| O <sub>2</sub> pulse increase (%)          | 0.54                                   | 4.93                      |
| HRR1                                       | 0.06                                   | 1.06                      |
| HRR2                                       | 0.37                                   | 3.26                      |

43

*HR: Heart rate; HRR: Heart rate recovery; O<sub>2</sub>p: O<sub>2</sub>pulse; OUES: Oxygen uptake efficiency slope;*

44

*RER: Respiratory exchange ratio; VAT: Ventilatory anaerobic threshold*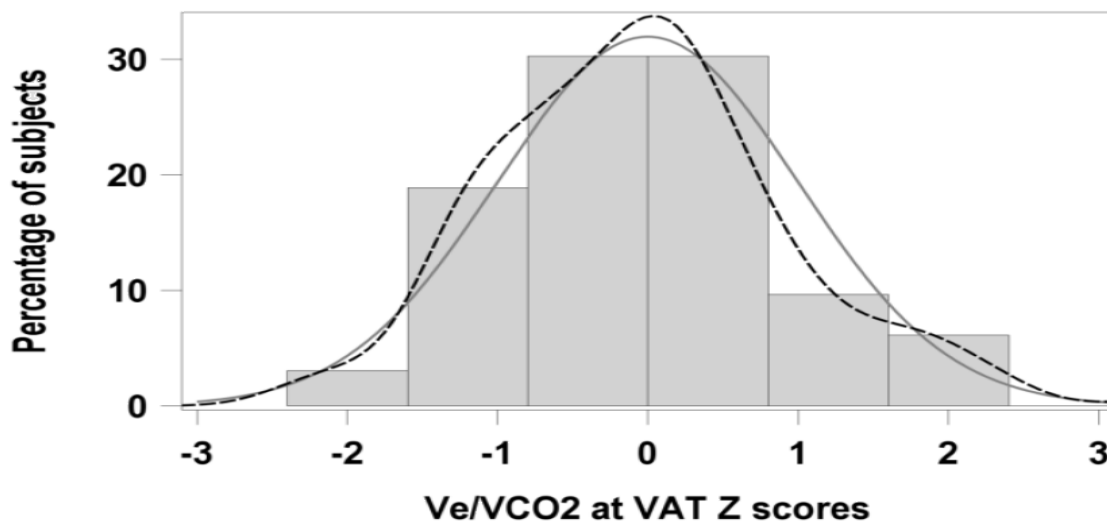

45

46

*Figure S6. Distribution for V<sub>e</sub>/VCO<sub>2</sub> at VAT Z scores (black dotted line) compared to a normal distribution (light grey).*

47

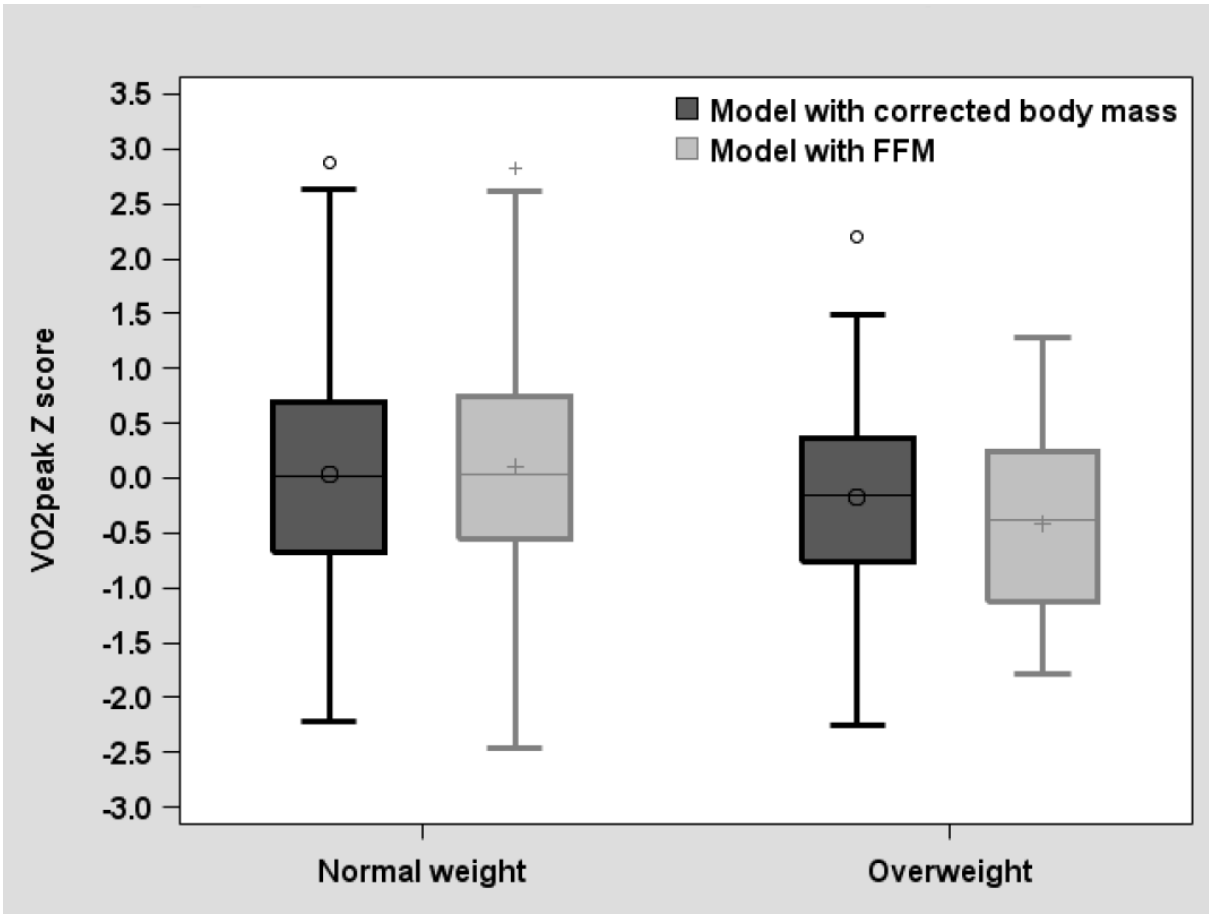

48  
 49 *Figure S7. Mean peak VO<sub>2</sub> Z score calculated with corrected body mass or fat-free-mass, stratified for normal*  
 50 *weight or overweight participants*

51

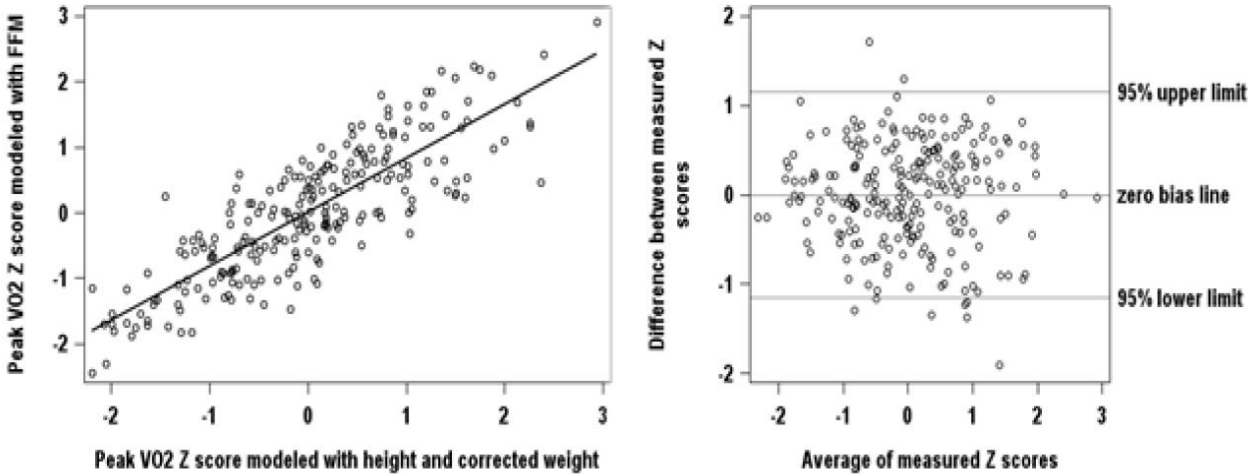

52  
 53 *Figure S8. Relationship and agreement between the Z score of the peak VO<sub>2</sub>, modeled with the FFM and*  
 54 *modeled with height and corrected weight*

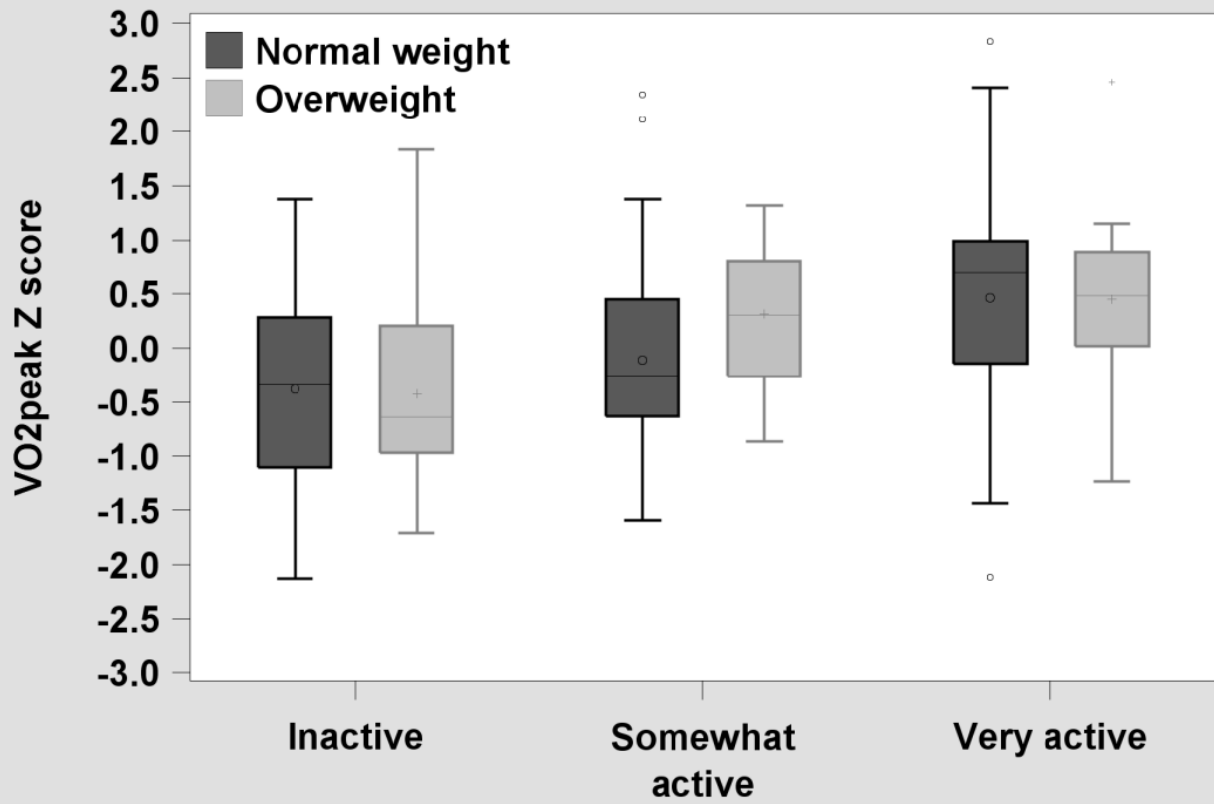

55  
56  
57

Figure S9. Peak  $VO_2$  Z scores stratified by level of habitual physical activity for normal weight and overweight participant
